# Supplementary material for: CRISPR Reveals a Distal Super-Enhancer Required for Sox2 Expression in Mouse Embryonic Stem Cells
Source: PLoS One. 2014 Dec 8;9(12):e114485. doi: 10.1371/journal.pone.0114485 (PMC4259346; doi:10.1371/journal.pone.0114485)
Supplement: S2 Table — A list of 136 genes upregulated after deleting Sox2 enhancer. (XLSX) [file pone.0114485.s004.xlsx]

## Sheet: Upgene
Table S2. A list of 136 genes upregulated after deleting Sox2 enhancer.
Acta1
Acta2
Aebp1
Anxa1
Anxa2
Anxa3
Arhgdib
Atp4b
Axl
B2m
Cald1
Camsap3
Capn2
Car4
Cav1
Ccdc80
Ccl2
Ccl7
Ccl8
Ccnd2
Cd24a
Cdkn1c
Cdkn2a
Cdkn2b
Cer1
Cldn6
Cnn2
Col12a1
Col1a1
Col1a2
Col3a1
Col5a1
Col5a2
Col6a1
Col6a2
Col8a1
Crabp1
Crabp2
Crip1
Crip2
Cryab
Csf1
Csrp1
Ctxn1
Dcn
Ecm1
Efemp1
Efemp2
Efnb2
Ehd2
Emb
Emp3
Epcam
Esrp1
Fbln2
Fbn1
Fgf5
Fgf8
Fgfbp1
Gadd45g
Gap43
Gm4340
Gng3
Gpc1
Gpx8
Grem1
Gsn
H19
Hand1
Igf2
Igfbp3
Igfbp4
Igfbp7
Inhba
Irs2
Krt18
Krt19
Krt7
Krt8
Lars2
Lefty1
Lgals1
Lgals3bp
Lox
Loxl2
Ly6a
Lyz2
Mgp
Mir1903
Mir675
Mmp3
Mrc2
Myl9
Nes
Nnat
Pea15a
Peg10
Peg3
Phlda2
Plac8
Postn
Prl2c2
Prl2c3
Prl2c4
Prss23
Rnu12
Rprl3
S100a11
S100a4
S100a6
Sct
Serpina3h
Serpinb9b
Serpine1
Serpinf1
Sfn
Slc16a3
Slc5a5
Spink3
Sulf1
T
Tagln
Thbs1
Thbs2
Timp2
Timp3
Tm4sf1
Tnc
Tnfrsf12a
Tpi1
Tpm1
Tpm2
Trh
Wisp2
Wnt8a
Zyx
